# Supplementary material for: The Interplay between Environmental Filtering and Spatial Processes in Structuring Communities: The Case of Neotropical Snake Communities
Source: PubMed Central journal article supplement (PMC4465701; doi:10.1371/journal.pone.0127959), 2015-06-10
Supplement: pone.0127959.s001.pdf [file pone.0127959.s001.pdf]

**S4 Fig. Topology**

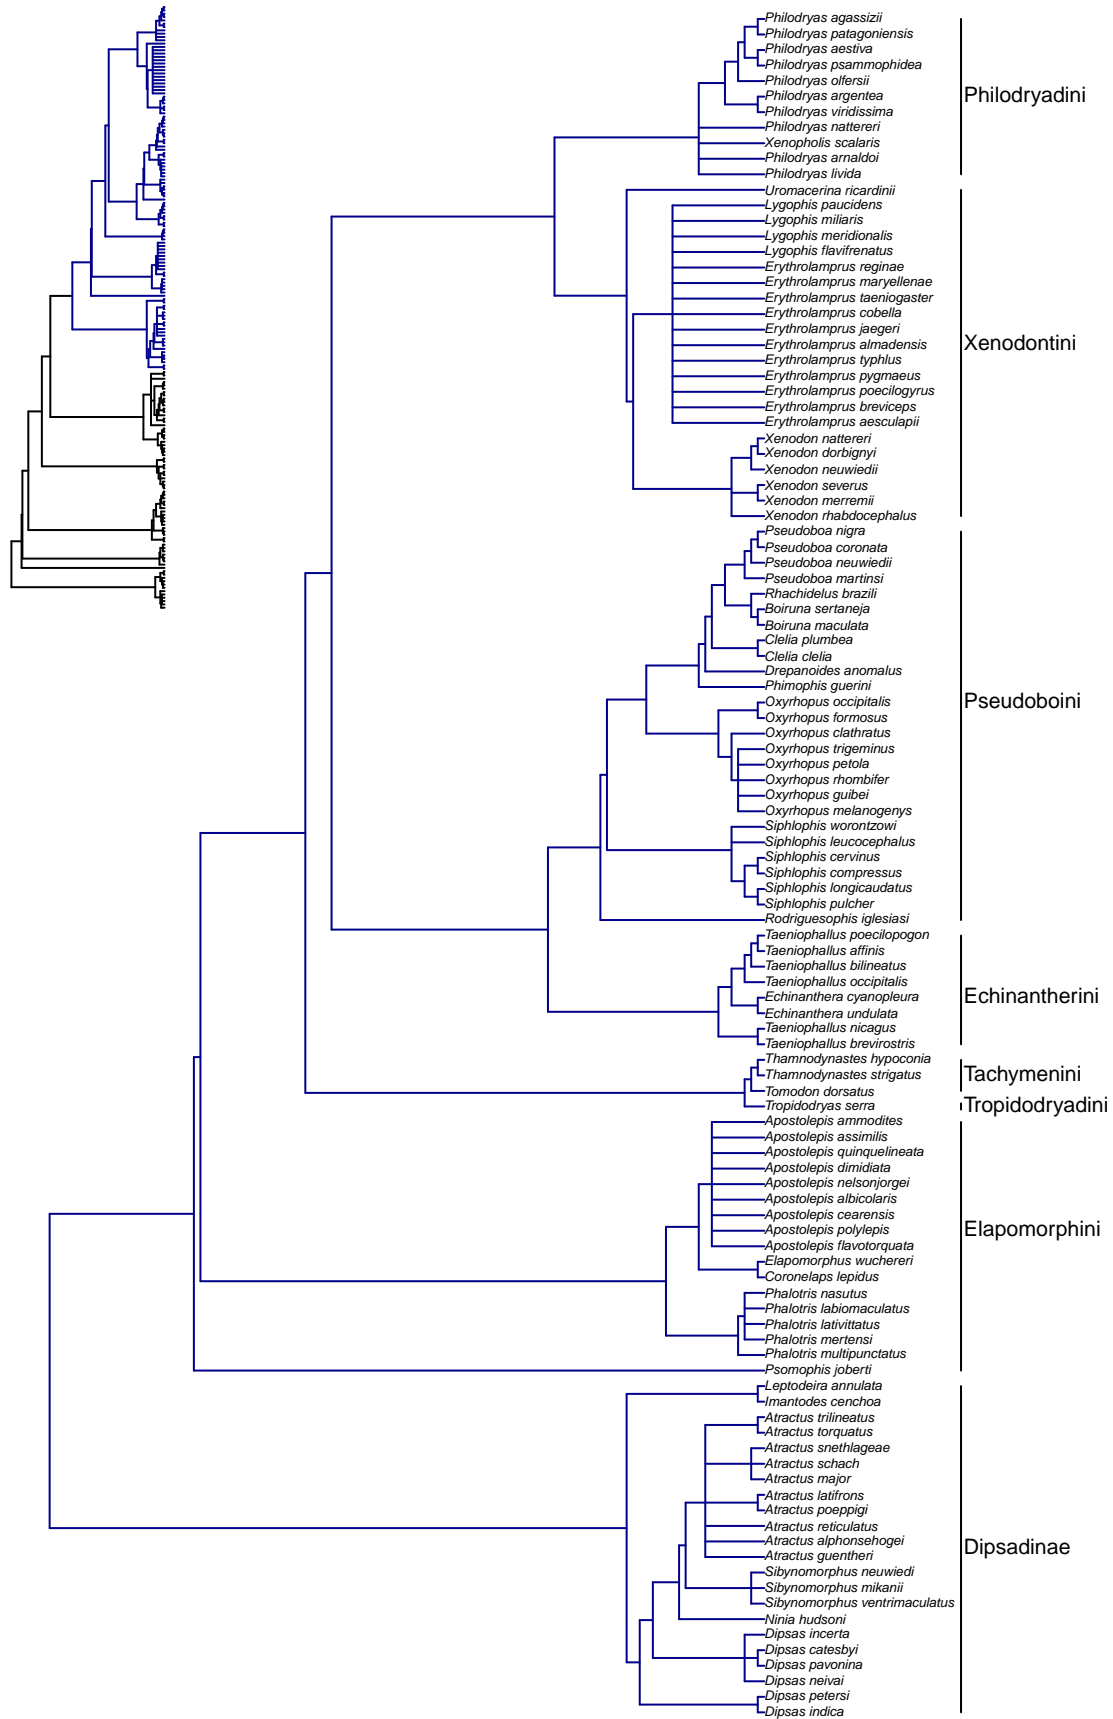

Topology of 182 snake species. The topology was compiled from multiple sources (see S5 File). Colors of clades indicate their position in the overall phylogeny, shown at left. Blue clade is Dipsadidae. Lines indicate family, subfamily or tribe. Branch lengths are only illustrative.

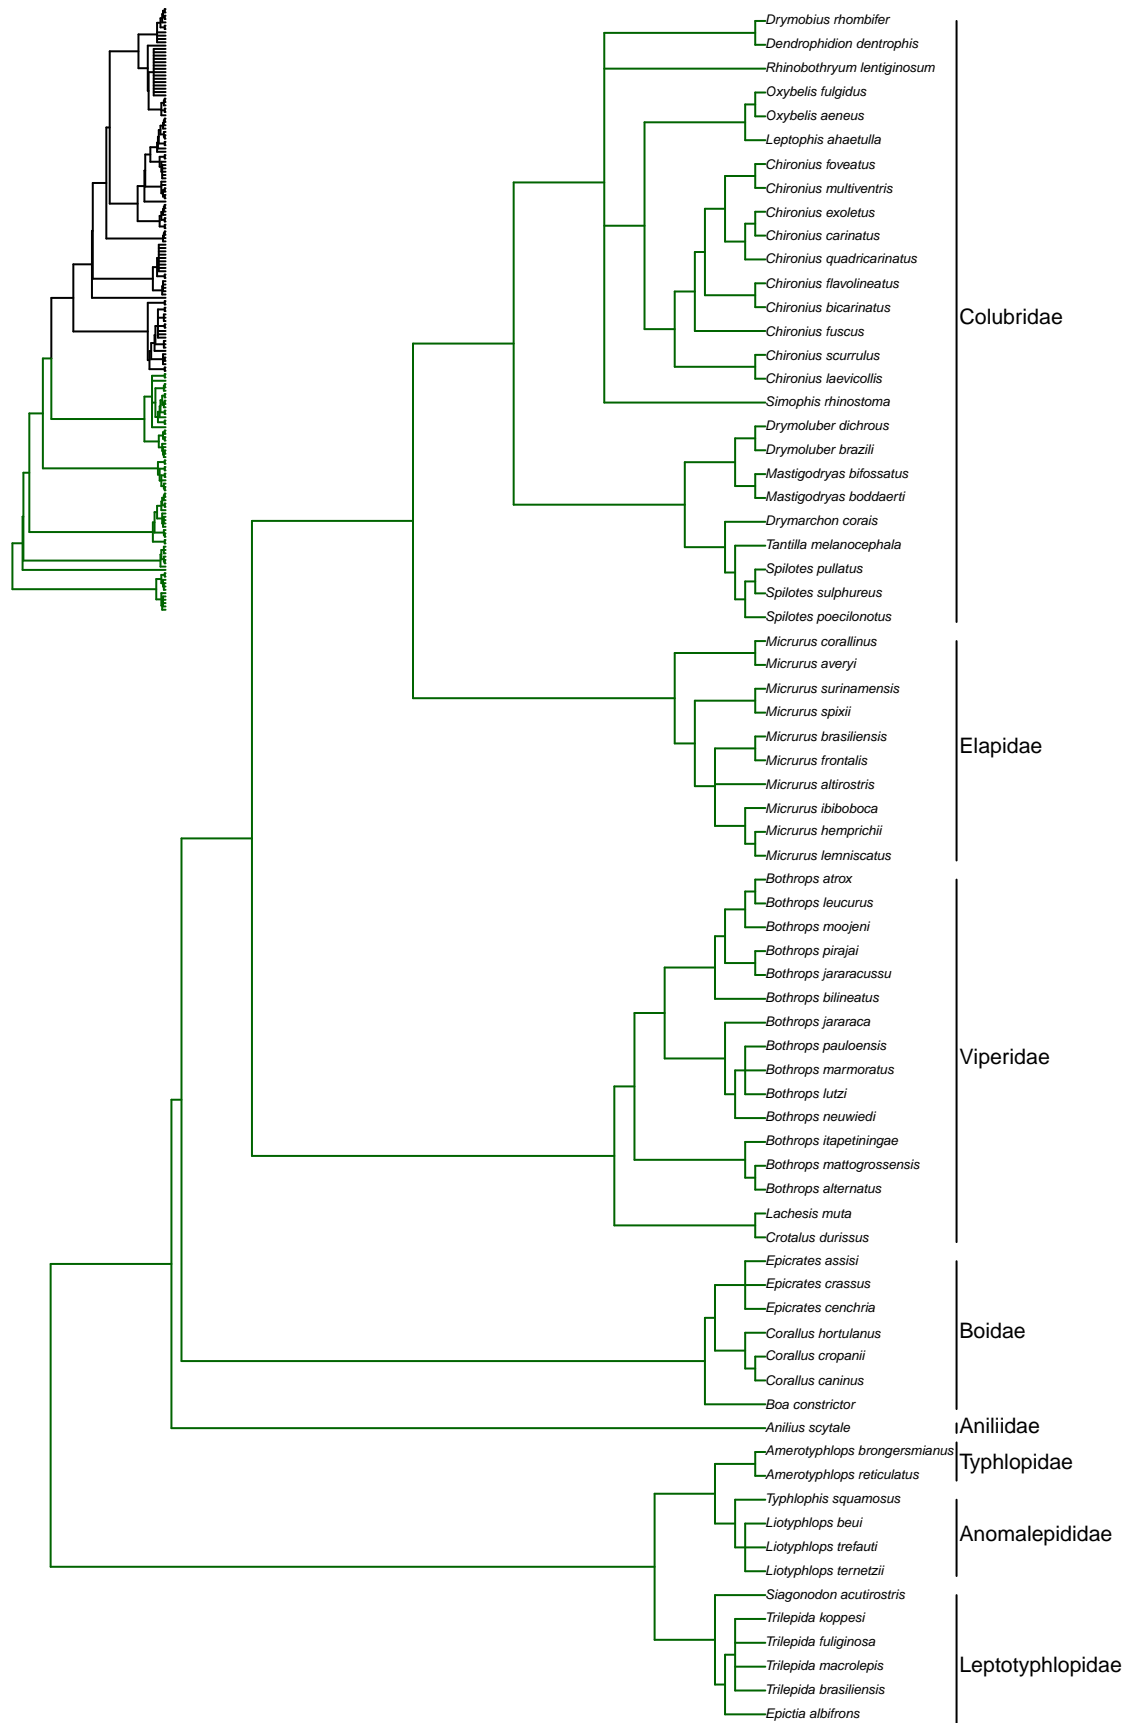

(continued)
