# Supplementary material for: The Interplay between Environmental Filtering and Spatial Processes in Structuring Communities: The Case of Neotropical Snake Communities
Source: PubMed Central journal article supplement (PMC4465701; doi:10.1371/journal.pone.0127959), 2015-06-10
Supplement: pone.0127959.s004.pdf [file pone.0127959.s004.pdf]

---

**FAMILY**

## SUBFAMILY

## Community

*Species*

AM 1

AM 2

AT 1

AT 2

AT 3

AT 4

CE 1

CE 2

CE 3

CE 4

CA 1

CA 2

---

**BOIDAE***Boa constrictor*

X

X

X

X

X

*Corallus caninus*

X

X

*Corallus cropanii*

X

*Corallus hortulanus*

X

X

X

X

*Epicrates assisi*

X

*Epicrates cenchria*

X

X

X

X

X

*Epicrates crassus*

X

**COLUBRIDAE***Chironius bicarinatus*

X

X

X

X

*Chironius carinatus*

X

*Chironius exoletus*

X

X

X

X

*Chironius flavolineatus*

X

X

X

*Chironius foveatus*

X

X

*Chironius fuscus*

X

X

X

*Chironius laevicollis*

X

X

---

**FAMILY**

## SUBFAMILY

## Community

*Species*

AM 1

AM 2

AT 1

AT 2

AT 3

AT 4

CE 1

CE 2

CE 3

CE 4

CA 1

CA 2

*Chironius multiventris*

X

*Chironius quadricarinatus*

X

*Chironius scurrulus*

X

X

*Dendrophidion dentrophis*

X

X

*Drymarchon corais*

X

X

X

*Drymobius rhombifer*

X

*Drymoluber brazili*

X

*Drymoluber dichrous*

X

X

X

*Leptophis ahaetulla*

X

X

X

X

*Mastigodryas bifossatus*

X

X

X

X

X

*Mastigodryas boddaerti*

X

X

X

*Oxybelis aeneus*

X

X

X

X

*Oxybelis fulgidus*

X

X

*Rhinobothryum lentiginosum*

X

X

*Spilotes poecilonotus*

X

X

*Spilotes pullatus*

X

X

X

X

X

---

**FAMILY**

## SUBFAMILY

## Community

*Species*

AM 1

AM 2

AT 1

AT 2

AT 3

AT 4

CE 1

CE 2

CE 3

CE 4

CA 1

CA 2

*Spilotes sulphureus*

X

X

*Simophis rhinostoma*

X

X

*Tantilla melanocephala*

X

X

X

X

X

X

X

X

**DIPSADIDAE**

## DIPSADINAE

*Atractus alphonsehogei*

X

*Atractus guentheri*

X

*Atractus latifrons*

X

X

*Atractus major*

X

*Atractus poeppigi*

X

*Atractus reticulatus*

X

*Atractus schach*

X

*Atractus snethlageae*

X

*Atractus torquatus*

X

*Atractus trilineatus*

X

*Dipsas catesbyi*

X

X

---

**FAMILY**

## SUBFAMILY

## Community

*Species*

AM 1

AM 2

AT 1

AT 2

AT 3

AT 4

CE 1

CE 2

CE 3

CE 4

CA 1

CA 2

*Dipsas incerta*

X

*Dipsas indica*

X

X

X

*Dipsas indica petersi*

X

X

*Dipsas pavonina*

X

X

*Dipsas variegata*

X

*Imantodes cenchoa*

X

X

X

X

*Leptodeira annulata*

X

X

X

*Ninia hudsoni*

X

*Sibynomorphus mikanii*

X

*Sibynomorphus neuwiedi*

X

X

X

*Sibynomorphus ventrimaculatus*

X

## XENODONTINAE

*Apostolepis albicolaris*

X

*Apostolepis ammodites*

X

*Apostolepis assimilis*

X

*Apostolepis cearensis*

X

---

**FAMILY**

## SUBFAMILY

## Community

*Species*

AM 1

AM 2

AT 1

AT 2

AT 3

AT 4

CE 1

CE 2

CE 3

CE 4

CA 1

CA 2

*Apostolepis dimidiata*

X

*Apostolepis flavotorquata*

X

*Apostolepis nelsonjorgei*

X

*Apostolepis polylepis*

X

*Apostolepis quinquelineata*

X

*Boiruna maculata*

X

X

X

X

*Boiruna sertaneja*

X

X

*Clelia clelia*

X

*Clelia plumbea*

X

X

X

*Coronelaps lepidus*

X

*Drepanoides anomalus*

X

X

*Echinanthera cyanopleura*

X

X

X

*Echinanthera undulata*

X

*Elapomorphus wuchereri*

X

*Erythrolamprus aesculapii*

X

X

X

*Erythrolamprus almadensis*

X

X

X

---

**FAMILY**

## SUBFAMILY

## Community

| <i>Species</i>                     | AM 1 | AM 2 | AT 1 | AT 2 | AT 3 | AT 4 | CE 1 | CE 2 | CE 3 | CE 4 | CA 1 | CA 2 |
|------------------------------------|------|------|------|------|------|------|------|------|------|------|------|------|
| <i>Erythrolamprus breviceps</i>    | X    |      |      |      |      |      |      |      |      |      |      |      |
| <i>Erythrolamprus cobella</i>      |      |      | X    |      |      |      |      |      |      |      |      |      |
| <i>Erythrolamprus jaegeri</i>      |      |      |      |      |      |      |      |      |      | X    | X    | X    |
| <i>Erythrolamprus maryellenae</i>  |      |      |      |      |      |      |      | X    |      |      |      |      |
| <i>Erythrolamprus poecilogyrus</i> |      |      | X    |      | X    | X    | X    |      | X    | X    |      | X    |
| <i>Erythrolamprus pygmaeus</i>     | X    |      |      |      |      |      |      |      |      |      |      |      |
| <i>Erythrolamprus reginae</i>      | X    | X    | X    |      |      |      |      |      |      |      |      |      |
| <i>Erythrolamprus taeniogaster</i> |      |      | X    |      |      |      |      |      |      |      |      |      |
| <i>Erythrolamprus typhlus</i>      | X    |      |      |      |      |      |      |      |      |      |      |      |
| <i>Lygophis flavifrenatus</i>      |      |      |      |      |      |      |      |      |      |      |      | X    |
| <i>Lygophis meridionalis</i>       |      |      |      |      |      |      |      | X    | X    | X    |      |      |
| <i>Lygophis miliaris</i>           |      |      | X    | X    | X    | X    |      |      |      |      | X    |      |
| <i>Lygophis paucidens</i>          |      |      |      |      |      |      |      | X    | X    |      |      |      |
| <i>Oxyrhopus clathratus</i>        |      |      |      | X    | X    |      |      |      |      |      |      |      |
| <i>Oxyrhopus formosus</i>          |      |      | X    |      |      |      |      |      |      |      |      |      |
| <i>Oxyrhopus guibei</i>            |      |      | X    |      |      |      |      | X    | X    | X    |      |      |

---

**FAMILY**

## SUBFAMILY

## Community

| <i>Species</i>                        | AM 1 | AM 2 | AT 1 | AT 2 | AT 3 | AT 4 | CE 1 | CE 2 | CE 3 | CE 4 | CA 1 | CA 2 |
|---------------------------------------|------|------|------|------|------|------|------|------|------|------|------|------|
| <i>Oxyrhopus melanogenys</i>          |      | X    |      |      |      |      |      |      |      |      |      |      |
| <i>Oxyrhopus occipitalis</i>          | X    |      |      |      |      |      |      |      |      |      |      |      |
| <i>Oxyrhopus petolarius digitalis</i> |      | X    | X    |      |      |      |      |      |      |      |      |      |
| <i>Oxyrhopus rhombifer</i>            |      |      |      |      | X    | X    | X    |      | X    | X    |      | X    |
| <i>Oxyrhopus trigeminus</i>           |      |      |      |      |      |      |      | X    | X    |      |      |      |
| <i>Phalotris labiomaculatus</i>       |      |      |      |      |      |      |      | X    |      |      |      |      |
| <i>Phalotris lativittatus</i>         |      |      |      |      |      |      |      |      |      | X    |      |      |
| <i>Phalotris mertensi</i>             |      |      |      |      |      |      |      |      |      | X    |      |      |
| <i>Phalotris multipunctatus</i>       |      |      |      |      |      |      |      |      |      | X    |      |      |
| <i>Phalotris nasutus</i>              |      |      |      |      |      |      |      |      | X    |      |      |      |
| <i>Philodryas aestiva</i>             |      |      |      |      |      | X    |      |      | X    | X    | X    |      |
| <i>Philodryas agassizii</i>           |      |      |      |      |      |      |      |      | X    | X    |      | X    |
| <i>Philodryas argentea</i>            | X    | X    |      |      |      |      |      |      |      |      |      |      |
| <i>Philodryas arnaldoi</i>            |      |      |      |      |      |      |      |      |      |      | X    |      |
| <i>Philodryas livida</i>              |      |      |      |      |      |      |      |      |      | X    |      |      |
| <i>Philodryas nattereri</i>           |      |      |      |      |      |      | X    | X    | X    |      |      |      |



---

**FAMILY**

## SUBFAMILY

## Community

*Species*

AM 1

AM 2

AT 1

AT 2

AT 3

AT 4

CE 1

CE 2

CE 3

CE 4

CA 1

CA 2

*Philodryas olfersii*

X

X

X

X

*Philodryas patagoniensis*

X

X

X

X

X

*Philodryas psammophidea*

X

*Philodryas viridissima*

X

*Phimophis guerini*

X

X

X

*Pseudoboa coronata*

X

*Pseudoboa martinsi*

X

*Pseudoboa neuwiedii*

X

*Pseudoboa nigra*

X

X

*Psomophis joberti*

X

X

*Rhachidelus brazili*

X

X

*Rodriguesophis iglesiasi*

X

X

*Siphlophis cervinus*

X

*Siphlophis compressus*

X

X

X

*Siphlophis leucocephalus*

X

*Siphlophis longicaudatus*

X

---

**FAMILY**

## SUBFAMILY

## Community

| <i>Species</i>                    | AM 1 | AM 2 | AT 1 | AT 2 | AT 3 | AT 4 | CE 1 | CE 2 | CE 3 | CE 4 | CA 1 | CA 2 |
|-----------------------------------|------|------|------|------|------|------|------|------|------|------|------|------|
| <i>Siphlophis pulcher</i>         |      |      | X    | X    |      |      |      |      |      |      |      |      |
| <i>Siphlophis worontzowi</i>      |      | X    |      |      |      |      |      |      |      |      |      |      |
| <i>Taeniophallus affinis</i>      |      |      |      |      | X    |      |      |      |      |      | X    |      |
| <i>Taeniophallus bilineatus</i>   |      |      |      |      | X    |      |      |      |      |      |      |      |
| <i>Taeniophallus brevirostris</i> | X    |      |      |      |      |      |      |      |      |      |      |      |
| <i>Taeniophallus nicagus</i>      | X    |      |      |      |      |      |      |      |      |      |      |      |
| <i>Taeniophallus occipitalis</i>  |      |      |      |      |      |      |      |      | X    | X    |      |      |
| <i>Taeniophallus poecilopogon</i> |      |      |      |      |      | X    |      |      |      |      | X    |      |
| <i>Thamnodynastes hypoconia</i>   |      |      |      |      | X    |      |      |      |      |      |      | X    |
| <i>Thamnodynastes strigatus</i>   |      |      |      | X    | X    | X    |      |      |      |      |      | X    |
| <i>Tomodon dorsatus</i>           |      |      |      | X    | X    | X    |      |      |      |      | X    |      |
| <i>Tropidodryas serra</i>         |      |      | X    | X    |      |      |      |      |      |      |      |      |
| <i>Uromacerina ricardinii</i>     |      |      |      | X    |      |      |      |      |      |      |      |      |
| <i>Xenodon dorbignyi</i>          |      |      |      |      |      |      |      |      |      |      |      | X    |
| <i>Xenodon merremii</i>           |      |      |      |      | X    |      | X    | X    | X    | X    |      | X    |
| <i>Xenodon nattereri</i>          |      |      |      |      |      |      |      |      | X    | X    |      |      |

---

**FAMILY**

## SUBFAMILY

## Community

*Species*

AM 1

AM 2

AT 1

AT 2

AT 3

AT 4

CE 1

CE 2

CE 3

CE 4

CA 1

CA 2

*Xenodon newiedii*

X

X

*Xenodon rabdocephalus*

X

X

X

*Xenodon severus*

X

*Xenopholis scalaris*

X

X

X

**ELAPIDAE***Micrurus altirostris*

X

X

*Micrurus averyi*

X

*Micrurus brasiliensis*

X

*Micrurus corallinus*

X

X

*Micrurus frontalis*

X

X

X

*Micrurus hemprichii*

X

X

*Micrurus ibiboboca*

X

X

*Micrurus lemniscatus*

X

*Micrurus spixii*

X

X

*Micrurus surinamensis*

X

X



---

**FAMILY**

## SUBFAMILY

## Community

*Species*

AM 1

AM 2

AT 1

AT 2

AT 3

AT 4

CE 1

CE 2

CE 3

CE 4

CA 1

CA 2

*Bothrops jararacussu*

X

*Bothrops leucurus*

X

*Bothrops lutzi*

X

X

X

*Bothrops marmoratus*

X

*Bothrops mattogrossensis*

X

*Bothrops moojeni*

X

X

*Bothrops neuwiedi*

X

X

X

*Bothrops pauloensis*

X

X

*Bothrops pirajai*

X

*Crotalus durissus*

X

X

X

X

*Lachesis muta*

X

X

X
