# Supplementary material for: The Interplay between Environmental Filtering and Spatial Processes in Structuring Communities: The Case of Neotropical Snake Communities
Source: PubMed Central journal article supplement (PMC4465701; doi:10.1371/journal.pone.0127959), 2015-06-10
Supplement: pone.0127959.s005.pdf [file pone.0127959.s005.pdf]

| <b>FAMILY</b>                    |                      |        |       |       |       |       |        |        |
|----------------------------------|----------------------|--------|-------|-------|-------|-------|--------|--------|
| SUBFAMILY                        | Morphological traits |        |       |       |       |       |        |        |
| <i>Species</i>                   | SVL                  | TL     | HL    | HW    | HH    | CAM   | VS     | SS     |
| <i>Boa constrictor</i>           | 905                  | 89.67  | 41.87 | 26.47 | 16.03 | 110   | 228.67 | 49.67  |
| <i>Corallus caninus</i>          | 1019.25              | 144.25 | 45.35 | 26.5  | 20.1  | 92    | 204.75 | 67.75  |
| <i>Corallus hortulanus</i>       | 1248.43              | 303.86 | 37.71 | 23.51 | 17.11 | 86.57 | 265.64 | 112    |
| <i>Coralus hortulanus</i>        | 1034                 | 263    | 35.4  | 22.9  | 12.4  | 80    | 264    | 109    |
| <i>Epicrates cenchria</i>        | 614.12               | 72.71  | 31.2  | 18.32 | 12.82 | 80.08 | 218.75 | 42.33  |
| <b>COLUBRIDAE</b>                |                      |        |       |       |       |       |        |        |
| <i>Chironius bicarinatus</i>     | 799.7                | 469    | 27.31 | 14.41 | 10.43 | 54.7  | 162.6  | 144.6  |
| <i>Chironius carinatus</i>       | 1287                 | 545    | 46    | 26.95 | 18.65 | 90    | 154    | 120    |
| <i>Chironius exoletus</i>        | 755.67               | 426.83 | 30.57 | 15.65 | 11.89 | 52.94 | 151.17 | 135.06 |
| <i>Chironius flavolineatus</i>   | 699.5                | 419.3  | 24.29 | 11.12 | 8.1   | 47.3  | 159.1  | 134.9  |
| <i>Chironius foveatus</i>        | 1104.89              | 641.78 | 36.28 | 18.03 | 12.89 | 69.44 | 174.33 | 155.67 |
| <i>Chironius fuscus</i>          | 725.93               | 409.33 | 26.57 | 14.02 | 10.33 | 60.4  | 147.67 | 124.8  |
| <i>Chironius laevicollis</i>     | 1220.22              | 539.44 | 49.42 | 25.03 | 17.56 | 94.22 | 157.89 | 108.56 |
| <i>Chironius multiventris</i>    | 1349.25              | 725.5  | 39.98 | 20.07 | 14.3  | 66.25 | 193    | 184.75 |
| <i>Chironius quadricarinatus</i> | 625.17               | 348.08 | 24.34 | 11.12 | 8.16  | 44.5  | 153.75 | 118.33 |
| <i>Chironius scurrulus</i>       | 1283.75              | 587    | 51.33 | 27.73 | 18.43 | 74.22 | 157.5  | 108.25 |
| <i>Dendrophidion dendrophis</i>  | 520                  | 448.5  | 19.65 | 10.05 | 7.35  | 40    | 154    | 163    |

| <b>FAMILY</b>                     |                      |        |       |       |       |        |        |        |
|-----------------------------------|----------------------|--------|-------|-------|-------|--------|--------|--------|
| SUBFAMILY                         | Morphological traits |        |       |       |       |        |        |        |
| <i>Species</i>                    | SVL                  | TL     | HL    | HW    | HH    | CAM    | VS     | SS     |
| <i>Drymarchon corais</i>          | 1578.2               | 310.53 | 53.25 | 32.06 | 24.02 | 121.33 | 211.13 | 73.87  |
| <i>Drymoluber brazili</i>         | 853                  | 364    | 27.9  | 13.4  | 9.7   | 57     | 197    | 110    |
| <i>Drymoluber dichrous</i>        | 756                  | 89.67  | 27.43 | 14.67 | 11.33 | 58.67  | 169.67 | 24.33  |
| <i>Leptophis ahaetulla</i>        | 649.93               | 401.14 | 21.64 | 10.54 | 6.86  | 40.57  | 165.07 | 152    |
| <i>Mastigodryas bifossatus</i>    | 1294.43              | 420.39 | 50.26 | 27.18 | 19.14 | 103.89 | 180.61 | 89.18  |
| <i>Mastigodryas boddaertii</i>    | 836.5                | 297.8  | 29.87 | 14.23 | 10.66 | 53.1   | 197.3  | 103.3  |
| <i>Oxybelis aeneus</i>            | 735.48               | 453.71 | 26.42 | 7.82  | 7.75  | 34.81  | 192.1  | 165.29 |
| <i>Oxybelis fulgidus</i>          | 1198.3               | 546.8  | 46.36 | 19.63 | 14.86 | 61.5   | 209.8  | 151.7  |
| <i>Rhinobothryum lentiginosum</i> | 879.75               | 220.25 | 25.23 | 16    | 10.7  | 52.5   | 249    | 105.5  |
| <i>Spilotes poecilonotus</i>      | 1028                 | 382.5  | 38.9  | 20    | 13.85 | 80     | 298.5  | 120    |
| <i>Spilotes pullatus</i>          | 1541.58              | 467.5  | 46.09 | 27.18 | 20.02 | 103.33 | 213    | 108.67 |
| <i>Spilotes sulphureus</i>        | 883                  | 292.5  | 33.92 | 17.77 | 13.7  | 59     | 214.25 | 127    |
| <i>Simophis rhinostoma</i>        | 589.77               | 154.62 | 22.02 | 11.72 | 8.67  | 44.46  | 182    | 66.15  |
| <i>Tantilla melanocephala</i>     | 250.24               | 69.65  | 9.26  | 4.74  | 3.75  | 22.65  | 150.82 | 49.76  |
| <b>DIPSADIDAE</b>                 |                      |        |       |       |       |        |        |        |
| DIPSADINAE                        |                      |        |       |       |       |        |        |        |
| <i>Atractus guentheri</i>         | 429.5                | 45     | 20.62 | 15    | 8.97  | 39     | 145    | 23     |

| FAMILY                               |                      |        |       |       |       |       |        |        |
|--------------------------------------|----------------------|--------|-------|-------|-------|-------|--------|--------|
| SUBFAMILY                            | Morphological traits |        |       |       |       |       |        |        |
| <i>Species</i>                       | SVL                  | TL     | HL    | HW    | HH    | CAM   | VS     | SS     |
| <i>Atractus latifrons</i>            | 444                  | 59.6   | 14.1  | 8.06  | 7.26  | 35    | 162.6  | 30.8   |
| <i>Atractus major</i>                | 443                  | 58     | 16.3  | 8.1   | 6.6   | 40    | 160    | 27     |
| <i>Atractus reticulatus</i>          | 325.67               | 40.83  | 12.07 | 6.17  | 5.31  | 33.42 | 154.25 | 23.75  |
| <i>Atractus schach</i>               | 64                   | 25     | 9.2   | 5.3   | 3.4   | 20    | 135    | 22     |
| <i>Atractus snethlageae</i>          | 364                  | 35.75  | 13.22 | 7.9   | 5.4   | 33.75 | 164    | 22.25  |
| <i>Atractus torquatus</i>            | 444                  | 64.5   | 16.45 | 8.05  | 6.35  | 35    | 164.5  | 36.5   |
| <i>Atractus trilineatus</i>          | 258.33               | 21.67  | 8.97  | 4.93  | 3.93  | 29    | 145    | 13.33  |
| <i>Dipsas catesbyi</i>               | 383                  | 137    | 13.9  | 7.05  | 5.05  | 27    | 179.5  | 92     |
| <i>Dipsas indica</i>                 | 506                  | 175.33 | 16.3  | 11.5  | 7.9   | 34    | 182.67 | 96.33  |
| <i>Dipsas indica petersi</i>         | 663.7                | 227.6  | 30.32 | 17.61 | 13.13 | 48.7  | 184.4  | 93.8   |
| <i>Dipsas pavonina</i>               | 202                  | 87     | 9.2   | 5.3   | 4.8   | 21    | 197    | 86     |
| <i>Dipsas variegata</i>              | 580.17               | 154    | 22.67 | 12.02 | 9.45  | 40.5  | 183    | 74.5   |
| <i>Imantodes cenchoa</i>             | 702.09               | 292.73 | 13.59 | 8.65  | 5.87  | 26.91 | 246.45 | 138.82 |
| <i>Leptodeira annulata</i>           | 492.8                | 157.87 | 18.45 | 11.4  | 7.22  | 38.53 | 188.8  | 81.4   |
| <i>Sibynomorphus mikani</i>          | 412.7                | 79.1   | 15.36 | 8.89  | 6.76  | 36.8  | 164.8  | 45.3   |
| <i>Sibynomorphus neuwiedi</i>        | 492.4                | 123.4  | 17.64 | 10.18 | 7.22  | 39.8  | 170.2  | 64.8   |
| <i>Sibynomorphus ventrimaculatus</i> | 367.2                | 80.8   | 15.32 | 7.9   | 6.73  | 35    | 152.9  | 40.1   |

| <b>FAMILY</b>                     |                      |        |       |       |       |        |        |       |
|-----------------------------------|----------------------|--------|-------|-------|-------|--------|--------|-------|
| SUBFAMILY                         | Morphological traits |        |       |       |       |        |        |       |
| <i>Species</i>                    | SVL                  | TL     | HL    | HW    | HH    | CAM    | VS     | SS    |
| <b>XENODONTINAE</b>               |                      |        |       |       |       |        |        |       |
| <i>Apostolepis albicolaris</i>    | 258                  | 33     | 6.8   | 4     | 2.8   | 17     | 220    | 31    |
| <i>Apostolepis ammodites</i>      | 521.12               | 44     | 12.84 | 6.96  | 5.45  | 30.5   | 244.12 | 27.62 |
| <i>Apostolepis assimilis</i>      | 249.67               | 26.83  | 7.38  | 3.7   | 2.6   | 16     | 226    | 21.17 |
| <i>Apostolepis dimidiata</i>      | 492.2                | 43.5   | 11.22 | 5.22  | 4.02  | 24.3   | 250.5  | 28    |
| <i>Apostolepis flavotorquata</i>  | 476.2                | 43.4   | 11.8  | 6.2   | 4.56  | 26.6   | 253.2  | 27.8  |
| <i>Apostolepis quinquilineata</i> | 472.6                | 49.6   | 12.38 | 7.66  | 4.52  | 29.6   | 225.4  | 27.2  |
| <i>Boiruna maculata</i>           | 1255.85              | 201.62 | 39.07 | 23.75 | 16.92 | 89.46  | 223.85 | 57    |
| <i>Clelia clelia</i>              | 1477.17              | 302.83 | 43.05 | 28.38 | 17.98 | 107.33 | 235    | 75.83 |
| <i>Clelia plumbea</i>             | 1730.22              | 333.11 | 51.23 | 30.75 | 20    | 109.72 | 232.83 | 89.17 |
| <i>Drepanoides anomalus</i>       | 398                  | 114    | 14.6  | 8.23  | 6.2   | 29     | 171.67 | 65    |
| <i>Echinanthera cyanopleura</i>   | 499                  | 223.6  | 19.63 | 9.4   | 6.56  | 37.5   | 153.1  | 92.5  |
| <i>Echinanthera undulata</i>      | 432.73               | 181.55 | 17.78 | 8.62  | 6.55  | 34.45  | 147    | 83.64 |
| <i>Elapomorphus wuchereri</i>     | 820.33               | 87.17  | 29.1  | 16.94 | 13.13 | 56.5   | 182.17 | 33    |
| <i>Erythrolamprus aesculapii</i>  | 701.07               | 93.4   | 22    | 12.78 | 9.61  | 46.47  | 189.47 | 43.13 |
| <i>Erythrolamprus almadensis</i>  | 395.83               | 99.83  | 17.91 | 9.83  | 7.18  | 37.5   | 152.92 | 59.17 |
| <i>Erythrolamprus jaegeri</i>     | 384.62               | 103.05 | 15.8  | 8.31  | 6.5   | 37.19  | 157.86 | 56.81 |

| <b>FAMILY</b>                         |                      |        |       |       |       |       |        |       |
|---------------------------------------|----------------------|--------|-------|-------|-------|-------|--------|-------|
| SUBFAMILY                             | Morphological traits |        |       |       |       |       |        |       |
| <i>Species</i>                        | SVL                  | TL     | HL    | HW    | HH    | CAM   | VS     | SS    |
| <i>Erythrolamprus poecilogyrus</i>    | 461.49               | 103.6  | 22.27 | 13.1  | 9     | 43.83 | 157.91 | 53.11 |
| <i>Erythrolamprus reginae</i>         | 378.22               | 105.33 | 16.73 | 9.14  | 6.07  | 35.44 | 142.56 | 51.33 |
| <i>Erythrolamprus taeniogaster</i>    | 547.75               | 108.25 | 24.91 | 13.91 | 11.1  | 52.5  | 152.25 | 50    |
| <i>Erythrolamprus typhlus</i>         | 367                  | 77     | 18.8  | 10.5  | 7.6   | 44    | 139    | 42    |
| <i>Lygophis flavifrenatus</i>         | 505.17               | 188.67 | 18.28 | 9.38  | 7.1   | 38.5  | 163.67 | 78.67 |
| <i>Lygophis meridionalis</i>          | 537.14               | 191.43 | 19.45 | 9     | 6.99  | 37.86 | 170.57 | 81.29 |
| <i>Lygophis miliaris</i>              | 623                  | 124.72 | 26.16 | 15.7  | 11.81 | 54.78 | 156.61 | 51.5  |
| <i>Lygophis paucidens</i>             | 365                  | 115.5  | 15.4  | 6.9   | 5.35  | 31    | 169    | 74    |
| <i>Oxyrhopus clathratus</i>           | 865.25               | 179.12 | 25.6  | 13.85 | 10.62 | 67.5  | 204.38 | 67.5  |
| <i>Oxyrhopus formosus</i>             | 764.33               | 176    | 22.96 | 11.66 | 7.98  | 49.33 | 198.5  | 74.33 |
| <i>Oxyrhopus guibei</i>               | 577.37               | 132.9  | 19.01 | 10.02 | 7.41  | 44.67 | 201.87 | 67.53 |
| <i>Oxyrhopus melanogenys</i>          | 531.4                | 120.2  | 17.5  | 8.92  | 6.06  | 39.4  | 201.4  | 59.6  |
| <i>Oxyrhopus petolarius digitalis</i> | 666.25               | 174    | 21.89 | 11.11 | 7.85  | 45.75 | 199.75 | 81.62 |
| <i>Oxyrhopus rhombifer</i>            | 478.68               | 100.53 | 17.24 | 9.51  | 6.81  | 42.26 | 188.63 | 59.21 |
| <i>Oxyrhopus trigeminus</i>           | 626.75               | 127.92 | 20.21 | 10.63 | 7.8   | 42.75 | 206.83 | 66.67 |
| <i>Phalotris mertensi</i>             | 536.5                | 48.5   | 13.35 | 8.1   | 5.95  | 30.5  | 218.5  | 26.5  |
| <i>Phalotris nasutus</i>              | 488.67               | 46.33  | 14.53 | 8.5   | 6.03  | 34    | 193.67 | 26.67 |

| FAMILY                          |                      |        |       |       |       |       |        |        |
|---------------------------------|----------------------|--------|-------|-------|-------|-------|--------|--------|
| SUBFAMILY                       | Morphological traits |        |       |       |       |       |        |        |
| <i>Species</i>                  | SVL                  | TL     | HL    | HW    | HH    | CAM   | VS     | SS     |
| <i>Philodryas aestiva</i>       | 704.12               | 274.38 | 23.34 | 11.35 | 8.78  | 49.62 | 195.38 | 112.5  |
| <i>Philodryas agassizii</i>     | 291.4                | 87.53  | 14.55 | 7.49  | 6.11  | 31.13 | 136.8  | 54.07  |
| <i>Philodryas argentea</i>      | 700.8                | 439    | 23.41 | 8.04  | 7.23  | 35    | 207.8  | 178.4  |
| <i>Philodryas nattereri</i>     | 768.75               | 297.75 | 30.45 | 17.3  | 11.82 | 63    | 208.62 | 107.5  |
| <i>Philodryas olfersi</i>       | 717.33               | 263.33 | 24.77 | 12.97 | 9.8   | 52.33 | 194.67 | 104.67 |
| <i>Philodryas patagoniensis</i> | 854.63               | 279.24 | 31.86 | 16.68 | 13.38 | 65.63 | 188.03 | 95.47  |
| <i>Philodryas psammophidea</i>  | 392                  | 125    | 18.8  | 10.4  | 8.6   | 40    | 156    | 65     |
| <i>Philodryas viridissima</i>   | 542                  | 195.5  | 20.25 | 11.3  | 7.75  | 38    | 216    | 112.5  |
| <i>Phimophis guerini</i>        | 792.88               | 155.62 | 22.88 | 13.34 | 9.38  | 63.19 | 209.38 | 66     |
| <i>Pseudoboa coronata</i>       | 723                  | 200    | 25.5  | 14.54 | 9.52  | 59.4  | 190.6  | 80.8   |
| <i>Pseudoboa neuwiedii</i>      | 774                  | 172.29 | 25.46 | 13.6  | 8.82  | 56.86 | 193.29 | 65.43  |
| <i>Pseudoboa nigra</i>          | 640.64               | 196.18 | 23.67 | 14.4  | 9.41  | 59.91 | 199.82 | 82.45  |
| <i>Rhachidelus brazili</i>      | 950.22               | 205.3  | 39.4  | 22.26 | 13.28 | 98.87 | 186.96 | 72.17  |
| <i>Siphlophis cervinus</i>      | 724.76               | 210.18 | 19.59 | 11.54 | 7.1   | 36.71 | 251.53 | 111.06 |
| <i>Siphlophis compressus</i>    | 702.88               | 189.88 | 19.24 | 12.29 | 7.55  | 111.5 | 248.62 | 106.12 |
| <i>Siphlophis leucocephalus</i> | 514                  | 147    | 17.57 | 10.46 | 5.66  | 34    | 232    | 109    |
| <i>Siphlophis longicaudatus</i> | 733.87               | 222.47 | 20.74 | 12.06 | 7.09  | 42.87 | 221.87 | 100.73 |

| <b>FAMILY</b>                     |                      |        |       |       |       |       |        |       |
|-----------------------------------|----------------------|--------|-------|-------|-------|-------|--------|-------|
| SUBFAMILY                         | Morphological traits |        |       |       |       |       |        |       |
| <i>Species</i>                    | SVL                  | TL     | HL    | HW    | HH    | CAM   | VS     | SS    |
| <i>Siphlophis pulcher</i>         | 619.12               | 172.12 | 17.18 | 10.9  | 7.36  | 43    | 234.38 | 96.12 |
| <i>Siphlophis worontzowi</i>      | 522                  | 121    | 16.65 | 8.5   | 6.73  | 31.5  | 228    | 108   |
| <i>Taeniophallus affinis</i>      | 386                  | 102.5  | 13.95 | 7.65  | 5.35  | 29.5  | 180.5  | 61    |
| <i>Taeniophallus brevirostris</i> | 253                  | 57.75  | 11.07 | 6.53  | 4.7   | 26.75 | 142.5  | 35.5  |
| <i>Taeniophallus nicagus</i>      | 356                  | 93     | 13.1  | 7.1   | 5     | 31    | 179    | 51    |
| <i>Taeniophallus occipitalis</i>  | 355.2                | 115.4  | 13.02 | 6.02  | 4.7   | 24    | 183.2  | 79.4  |
| <i>Taeniophallus poecilopogon</i> | 309.5                | 94     | 13.05 | 6.1   | 3.3   | 27    | 152.5  | 60    |
| <i>Thamnodynastes hypoconia</i>   | 369                  | 119.5  | 18.45 | 8.75  | 7.3   | 41    | 142    | 63.5  |
| <i>Thamnodynastes strigatus</i>   | 506.4                | 129.6  | 27.11 | 16.32 | 11.85 | 61.1  | 140.3  | 56.1  |
| <i>Tomodon dorsatus</i>           | 520.92               | 146.08 | 22.49 | 12.63 | 10.01 | 56.17 | 145.5  | 64.08 |
| <i>Tropidodryas serra</i>         | 986.5                | 218.5  | 34.92 | 20.48 | 13.7  | 66.25 | 220.5  | 87.75 |
| <i>Xenodon dorbignyi</i>          | 499                  | 65.75  | 21.73 | 13.25 | 10.6  | 53.75 | 130.25 | 32    |
| <i>Xenodon merremii</i>           | 860.86               | 123.54 | 44.54 | 29.32 | 19.84 | 93.79 | 147.75 | 37.36 |
| <i>Xenodon nattereri</i>          | 323                  | 51     | 15.37 | 8.5   | 7.27  | 34.33 | 145.67 | 28.67 |
| <i>Xenodon neuwiedii</i>          | 629.73               | 116.27 | 27.67 | 17.05 | 11.57 | 57.45 | 164.91 | 57.82 |
| <i>Xenodon rabdocephalus</i>      | 565                  | 93.88  | 27.02 | 17.93 | 10.88 | 57.75 | 143.5  | 38.38 |
| <i>Xenodon severus</i>            | 437.5                | 65.5   | 27.65 | 20.55 | 12.65 | 57.5  | 127.5  | 33.5  |



| <b>FAMILY</b>                    |                      |        |       |       |       |        |        |       |
|----------------------------------|----------------------|--------|-------|-------|-------|--------|--------|-------|
| SUBFAMILY                        | Morphological traits |        |       |       |       |        |        |       |
| <i>Species</i>                   | SVL                  | TL     | HL    | HW    | HH    | CAM    | VS     | SS    |
| <i>Xenopholis scalaris</i>       | 251.8                | 49     | 10.47 | 5.64  | 3.95  | 27.4   | 134.9  | 28.9  |
| <b>ELAPIDAE</b>                  |                      |        |       |       |       |        |        |       |
| <i>Micrurus averyi</i>           | 478.67               | 46     | 13.23 | 7.43  | 5.3   | 28.33  | 208.33 | 24.67 |
| <i>Micrurus corallinus</i>       | 698.2                | 89.7   | 19.08 | 11.41 | 8.45  | 42.2   | 213.8  | 30.8  |
| <i>Micrurus frontalis</i>        | 787.33               | 47.5   | 19.85 | 11.1  | 7.6   | 41.25  | 227.75 | 20.33 |
| <i>Micrurus hemprichii</i>       | 436                  | 48     | 13.8  | 7.9   | 5.5   | 30     | 173    | 24    |
| <i>Micrurus ibiboboca</i>        | 801.8                | 146.6  | 23.03 | 13.28 | 10.37 | 47.6   | 213.6  | 20.4  |
| <i>Micrurus spixii</i>           | 452.5                | 32.5   | 14    | 7.9   | 5.55  | 30.5   | 207.5  | 19.5  |
| <i>Micrurus surinamensis</i>     | 531.75               | 66.25  | 22.6  | 15.18 | 9.15  | 49.5   | 163.75 | 28.75 |
| <b>LEPTOTYPHLOPIDAE</b>          |                      |        |       |       |       |        |        |       |
| <i>Epictia albifrons</i>         | 183                  | 18     | 4.8   | 2.9   | 2.4   | 20     | 180    | 17    |
| <i>Trilepida fuliginosa</i>      | 163.33               | 19.33  | 7.17  | 3.73  | 2.93  | 21     | 175.67 | 16.67 |
| <i>Trilepida koppersi</i>        | 222                  | 20.67  | 7.7   | 4.13  | 3.6   | 25.33  | 172.67 | 12.67 |
| <b>TYPHLOPIDAE</b>               |                      |        |       |       |       |        |        |       |
| <i>Amerotyphlops reticulatus</i> | 320.88               | 11.5   | 11.35 | 8.18  | 5.69  | 39.12  | 216    | 8.5   |
| <b>VIPERIDAE</b>                 |                      |        |       |       |       |        |        |       |
| <i>Bothrops alternatus</i>       | 1002.91              | 102.27 | 47.11 | 31.15 | 18.98 | 119.64 | 176    | 36.27 |

| <b>FAMILY</b>                   |                      |        |       |       |       |        |        |       |
|---------------------------------|----------------------|--------|-------|-------|-------|--------|--------|-------|
| SUBFAMILY                       | Morphological traits |        |       |       |       |        |        |       |
| <i>Species</i>                  | SVL                  | TL     | HL    | HW    | HH    | CAM    | VS     | SS    |
| <i>Bothrops atrox</i>           | 926.86               | 127.29 | 41.96 | 26.94 | 16.84 | 85.43  | 199.29 | 56.29 |
| <i>Bothrops bilineatus</i>      | 649                  | 95     | 27.2  | 14.5  | 10    | 44     | 214    | 56    |
| <i>Bothrops itapetiningae</i>   | 446.86               | 48.71  | 25.91 | 16.04 | 11.33 | 58.29  | 149.57 | 28.43 |
| <i>Bothrops jararaca</i>        | 995.2                | 132.7  | 40.32 | 26.07 | 17.16 | 82.6   | 199.8  | 59.7  |
| <i>Bothrops jararacussu</i>     | 1242.75              | 149.75 | 61.22 | 45.29 | 25.16 | 147    | 177.12 | 51.38 |
| <i>Bothrops leucurus</i>        | 1022.4               | 142.2  | 45.51 | 29.74 | 18.28 | 92.8   | 199.6  | 60.4  |
| <i>Bothrops lutzi</i>           | 582.75               | 78.25  | 29.23 | 18.38 | 11.4  | 59.25  | 169.75 | 41.75 |
| <i>Bothrops marmoratus</i>      | 621                  | 65     | 28.9  | 18.7  | 10.9  | 67     | 173    | 34    |
| <i>Bothrops mattogrossensis</i> | 558.33               | 78     | 27.9  | 18.33 | 11.5  | 53     | 171.33 | 45.33 |
| <i>Bothrops neuwiedi</i>        | 535.5                | 71.5   | 26.55 | 17.8  | 12.65 | 66     | 168.5  | 46.5  |
| <i>Bothrops pauloensis</i>      | 546.69               | 66.44  | 27.17 | 16.61 | 11.26 | 54.25  | 172.44 | 40.94 |
| <i>Bothrops pirajai</i>         | 892                  | 132    | 50.5  | 36.6  | 22.5  | 124    | 158    | 58    |
| <i>Crotalus durissus</i>        | 879.95               | 69.25  | 42.87 | 28.8  | 19.69 | 124.9  | 175.5  | 23.55 |
| <i>Lachesis muta</i>            | 1576                 | 146    | 62.3  | 41.5  | 27.03 | 145.67 | 230.33 | 45.33 |
